# Supplementary material for: Panel data analysis of the effect of ambient temperature on antimicrobial resistance in China
Source: Research Square preprint supplement (doi:10.21203/rs.3.rs-5777544/v1), 2025-04-29
Supplement: Supplementary file 1 [file d8f80b847352c276148d3e18.docx]

**Effect of ambient temperature on antimicrobial resistance in China: a panel data analysis based on 2014-2023**

**Supplementary Material**

**Supplementary Table S1**

Results of regression analysis of cumulative average ambient temperature change on AMR (Southern China).

| Year | CRKP | | | CRPA | | | CRAB | | |
| --- | --- | --- | --- | --- | --- | --- | --- | --- | --- |
| Coef. | P | Adj.R2 | Coef. | P | Adj.R2 | Coef. | P | Adj.R2 |
| L1 | 0.053 | 0.530 | 0.528 | 0.033 | 0.368 | 0.633 | 0.002 | 0.943 | 0.347 |
| L2 | -0.109 | 0.154 | 0.533 | -0.035 | 0.294 | 0.634 | -0.014 | 0.500 | 0.349 |
| L3 | -0.134 | 0.063 | 0.538 | -0.045 | 0.156 | 0.637 | -0.039 | 0.041 | 0.366 |
| L4 | -0.109 | 0.143 | 0.534 | -0.077 | 0.017 | 0.646 | 0.003 | 0.874 | 0.347 |
| L5 | -0.056 | 0.407 | 0.529 | -0.058 | 0.044 | 0.642 | 0.006 | 0.715 | 0.347 |

**Supplementary Table S2**

Results of regression analysis of cumulative average ambient temperature change on AMR (Northern China).

| Year | CRKP | | | CRPA | | | CRAB | | |
| --- | --- | --- | --- | --- | --- | --- | --- | --- | --- |
| Coef. | P | Adj.R2 | Coef. | P | Adj.R2 | Coef. | P | Adj.R2 |
| L1 | -0.079 | 0.558 | 0.351 | 0.001 | 0.986 | 0.531 | -0.035 | 0.475 | 0.119 |
| L2 | -0.237 | 0.083 | 0.363 | 0.008 | 0.854 | 0.531 | -0.051 | 0.300 | 0.122 |
| L3 | -0.333 | 0.008 | 0.382 | -0.039 | 0.352 | 0.534 | -0.047 | 0.300 | 0.122 |
| L4 | -0.408 | 0.001 | 0.397 | -0.04 | 0.347 | 0.543 | -0.049 | 0.283 | 0.123 |
| L5 | -0.245 | 0.029 | 0.371 | -0.039 | 0.298 | 0.535 | -0.031 | 0.445 | 0.119 |

**Supplementary Table S3**

Summary of annual average temperatures by region from 2014-2023(°C).

| Region | 2014 | 2015 | 2016 | 2017 | 2018 | 2019 | 2020 | 2021 | 2022 | 2023 |
| --- | --- | --- | --- | --- | --- | --- | --- | --- | --- | --- |
| Beijing | 14.1 | 13.7 | 13.8 | 14.2 | 13.6 | 13.8 | 13.8 | 13.6 | 13.4 | 14.3 |
| Tianjin | 14 | 13.7 | 13.8 | 14.2 | 13.8 | 14.2 | 13.8 | 13.6 | 13.6 | 14.2 |
| Hebei | 14.9 | 14.6 | 14.6 | 15 | 14.6 | 14.9 | 14.7 | 15.3 | 14.7 | 15.6 |
| Shanxi | 10.9 | 11.3 | 11.2 | 11.5 | 11.4 | 11.6 | 11.2 | 11.7 | 11.2 | 11.4 |
| Inner Mongolia | 7.7 | 7.7 | 7.1 | 7.7 | 7.3 | 7.3 | 7 | 7.7 | 7.6 | 7.9 |
| Liaoning | 9.2 | 9 | 8.8 | 9.3 | 8.8 | 9.5 | 9.2 | 9.2 | 8.7 | 9.8 |
| Jilin | 7.1 | 7.2 | 6.6 | 7 | 6.8 | 7.6 | 7.1 | 7.2 | 6.9 | 7.8 |
| Heilongjiang | 5.1 | 5.6 | 5 | 5.1 | 5.1 | 5.9 | 5.4 | 5.5 | 5.2 | 5.7 |
| Shanghai | 17 | 17 | 17.6 | 17.7 | 17.7 | 17.4 | 17.8 | 18.1 | 18 | 17.9 |
| Zhejiang | 16.4 | 16.4 | 16.8 | 17 | 17 | 17.1 | 17.1 | 17.6 | 17.6 | 17.1 |
| Jiangsu | 17.5 | 17.5 | 18.2 | 18.3 | 18.1 | 18 | 18.3 | 18.8 | 18.4 | 18.7 |
| Anhui | 16.5 | 16.7 | 17 | 17.1 | 17 | 16.3 | 16.2 | 16.7 | 16.9 | 16.6 |
| Fujian | 20.8 | 20.7 | 21 | 21.2 | 20.9 | 20.8 | 21.5 | 21.8 | 21.2 | 21.4 |
| Jiangxi | 18.8 | 18.7 | 19 | 19.2 | 19.2 | 19.1 | 19.1 | 19.7 | 19.4 | 19.6 |
| Shandong | 15.4 | 15 | 15.4 | 15.7 | 15.4 | 15.7 | 15 | 15.5 | 15.5 | 16.3 |
| Henan | 16.3 | 15.9 | 16.4 | 16.8 | 16.5 | 16.5 | 16.5 | 16.9 | 16.7 | 16.8 |
| Hubei | 16.7 | 16.8 | 17.3 | 17.3 | 17.3 | 17.3 | 17.1 | 17.9 | 18 | 17.9 |
| Hunan | 18.6 | 17.4 | 17.5 | 17.7 | 17.7 | 17.4 | 17.5 | 18.2 | 18.1 | 18.3 |
| Guangdong | 21.7 | 22.3 | 21.9 | 22.1 | 22.1 | 22.7 | 22.7 | 22.9 | 22 | 22.7 |
| Guangxi | 21.6 | 22.2 | 22.3 | 21.9 | 21.8 | 22.1 | 22.1 | 22.6 | 21.8 | 22.5 |
| Hainan | 24.7 | 25.3 | 24.6 | 24.6 | 24.4 | 25.8 | 25.3 | 25.1 | 24.5 | 25.2 |
| Chongqing | 18.6 | 19.6 | 19.5 | 19.4 | 19.3 | 19.2 | 19.2 | 19.5 | 20.5 | 20.1 |
| Sichuan | 16 | 16.8 | 16.8 | 16.6 | 16.5 | 16.4 | 16.6 | 16.7 | 17.3 | 17.3 |
| Guizhou | 14.7 | 15.2 | 15.3 | 15.2 | 14.8 | 15 | 14.9 | 15.4 | 15 | 16.0 |
| Yunnan | 16.4 | 16.2 | 15.8 | 15.7 | 15.7 | 16.7 | 16.5 | 16.9 | 16.1 | 17.2 |
| Xizang | 9.4 | 9.5 | 9.5 | 9.8 | 9.3 | 9.6 | 9.7 | 10.3 | 10.1 | 10 |
| Shaanxi | 15.2 | 15.2 | 15.8 | 15.6 | 15.5 | 15.3 | 15.2 | 15.5 | 15.9 | 15.5 |
| Gansu | 7.7 | 8.3 | 8.2 | 8 | 7.9 | 8 | 8.1 | 8.3 | 8.7 | 8.4 |
| Qinghai | 5.7 | 6.4 | 6.6 | 6.3 | 6.3 | 6.4 | 6.1 | 6.6 | 6.9 | 6.8 |
| Ningxia | 10.7 | 10.7 | 10.7 | 11 | 10.6 | 10.8 | 10.7 | 11.3 | 11 | 11.2 |

**Statistical modeling**

Considering the existence of unobserved influencing factors, we conducted panel data analyses to address potential spatial-temporal heterogeneity. The F test **(Supplementary Table S4**) indicate that a fixed effect model is suitable for panel data analyses. We then established models with fixed individual effects (**Supplementary Table S5**), with fixed time effects (**Supplementary Table S6**) and with two-way fixed effects **(Supplementary Table S7)**, respectively.

**Supplementary Table S4**

fixed individual effects model comparison of the within and the pooling model.

| F test | CRKP | | CRPA | | CRAB | |
| --- | --- | --- | --- | --- | --- | --- |
| F | p | F | p | F | p |
| Individual effects | 68.58 | 0.001 | 15.41 | 0.001 | 10.40 | 0.001 |
| Time effects | 31.09 | 0.001 | 51.86 | 0.001 | 52.96 | 0.001 |
| Two-way effects | 34.07 | 0.001 | 22.56 | 0.001 | 9.55 | 0.001 |

**Supplementary Table S5**

Fixed individual effects model.

| Variables | CRKP | | CRPA | | CRAB | |
| --- | --- | --- | --- | --- | --- | --- |
| Coef. | P | Coef. | P | Coef. | P |
| X | 0.063 | 0.000 | 0.017 | 0.022 | 0.022 | 0.000 |
| C1 | 0.007 | 0.000 | 0.002 | 0.010 | 0.001 | 0.119 |
| C2 | -0.427 | 0.324 | -0.382 | 0.039 | -0.136 | 0.343 |
| C3 | 0.031 | 0.000 | 0.007 | 0.051 | 0.008 | 0.004 |
| C4 | 0.053 | 0.546 | 0.025 | 0.504 | 0.047 | 0.107 |
| C5 | -0.105 | 0.000 | -0.033 | 0.000 | 0.001 | 0.928 |
| C6 | 0.021 | 0.025 | 0.015 | 0.000 | -0.002 | 0.465 |
| C7 | 0.028 | 0.000 | 0.008 | 0.000 | 0.006 | 0.000 |

**Supplementary Table S6**

Fixed time effects model.

| Variables | CRKP | | CRPA | | CRAB | |
| --- | --- | --- | --- | --- | --- | --- |
| Coef. | P | Coef. | P | Coef. | P |
| X | -0.029 | 0.677 | -0.004 | 0.893 | -0.022 | 0.292 |
| C1 | 0.001 | 0.326 | -0.001 | 0.182 | 0.001 | 0.077 |
| C2 | -0.430 | 0.483 | 0.221 | 0.394 | -0.314 | 0.098 |
| C3 | -0.005 | 0.503 | -0.001 | 0.658 | -0.004 | 0.032 |
| C4 | 0.002 | 0.966 | 0.001 | 0.934 | 0.011 | 0.364 |
| C5 | -0.069 | 0.142 | 0.006 | 0.771 | 0.018 | 0.216 |
| C6 | -0.006 | 0.226 | 0.001 | 0.501 | -0.001 | 0.459 |
| C7 | 0.000 | 0.875 | 0.001 | 0.524 | 0.003 | 0.000 |

**Supplementary Table S7**

Two-way fixed effects model.

| Variables | CRKP | | CRPA | | CRAB | |
| --- | --- | --- | --- | --- | --- | --- |
| Coef. | P | Coef. | P | Coef. | P |
| X | 0.082 | 0.000 | 0.027 | 0.000 | 0.024 | 0.000 |
| C1 | 0.004 | 0.013 | 0.000 | 0.491 | 0.001 | 0.278 |
| C2 | -0.152 | 0.714 | -0.231 | 0.174 | -0.110 | 0.445 |
| C3 | 0.035 | 0.000 | 0.010 | 0.004 | 0.009 | 0.002 |
| C4 | 0.075 | 0.367 | 0.037 | 0.277 | 0.049 | 0.091 |
| C5 | -0.093 | 0.000 | -0.026 | 0.001 | 0.002 | 0.790 |
| C6 | 0.005 | 0.603 | 0.006 | 0.118 | -0.004 | 0.242 |
| C7 | 0.021 | 0.000 | 0.004 | 0.003 | 0.006 | 0.000 |
